# Supplementary material for: The Uptake of Apoptotic Cells Drives Coxiella burnetii Replication and Macrophage Polarization: A Model for Q Fever Endocarditis
Source: PLOS journal article supplement (doi:10.1371/journal.ppat.1000066), 2008-05-15
Supplement: S1 (10.1371/journal.ppat.1000066.s001) [file journal.ppat.1000066.s001]

Sequences of primers used in qPCR experiments

| **Target gene** | **Forward primers (5'→3')** | **Reverse primers (5'→3')** | **Amplicon size (bp)** |
| --- | --- | --- | --- |
| com1 | GCACTATTTTTAGCCGGAACCTT | TTGAGGAGAAAAACTGGATTGAGA | 75 |
| β-actin | GGAAATCGTGCGTGACATTA | AGGAAGGAAGGCTGGAAGAG | 182 |
| CXCL8 | CTGGACCCCAAGGAAAACTG | CCTACAACAGACCCACACAATAC | 171 |
| IL-12p40 | AGGGGACAACAAGGAGTATGAGT | AGGGAGAAGTAGGAATGTGGAGT | 270 |
| iNOS | GACTTTCCAAGACACACTTCACC | CTATCTCCTTTGTTACCGCTTCC | 239 |
| IL-6 | ACACAGACAGCCACTCACCTCT | ACCTCAAACTCCAAAAGACCAG | 246 |
| IL-10 | GCTCCAAGAGAAAGGCATCTACA | GGGGGTTGAGGTATCAGAGGTAA | 246 |
| TGF-β1 | TCTATGACAAGTTCAAGCAGA | GACATCAAAAGATAACCACTC | 242 |
